# Supplementary material
Source: PubMed Central journal article supplement (PMC4907411)
Supplement: supp_jiw083_jiw083supp.pdf [file supp_jiw083_jiw083supp.pdf]

**Supplementary Table 1. Participant characteristics, by baseline serostatus (any HPV type), among men in the HIM Study (Tampa, FL, Cuernavaca, MX, and São Paulo, BZ)**

|                                 | Baseline serum                        |                                      | P-value <sup>c</sup> |
|---------------------------------|---------------------------------------|--------------------------------------|----------------------|
|                                 | antibody level                        |                                      |                      |
|                                 | Seronegative <sup>a</sup><br>(n=1132) | Seropositive <sup>b</sup><br>(n=486) |                      |
| Country                         |                                       |                                      | <0.0001              |
| USA                             | 460 (40.6%)                           | 102 (21.0%)                          |                      |
| Brazil                          | 319 (28.2%)                           | 180 (37.0%)                          |                      |
| Mexico                          | 353 (31.2%)                           | 204 (42.0%)                          |                      |
| Age (years)                     |                                       |                                      | <0.0001              |
| 18–30                           | 579 (51.1%)                           | 176 (36.2%)                          |                      |
| 31–44                           | 385 (34.0%)                           | 204 (42.0%)                          |                      |
| 45–73                           | 168 (14.8%)                           | 106 (21.8%)                          |                      |
| Marital status                  |                                       |                                      | 0.001                |
| Single                          | 518 (45.8%)                           | 177 (36.4%)                          |                      |
| Married or cohabiting           | 510 (45.1%)                           | 264 (54.3%)                          |                      |
| Divorced, separated, or widowed | 100 (8.8%)                            | 44 (9.1%)                            |                      |
| Missing data                    | 4 (0.4%)                              | 1 (0.2%)                             |                      |
| Education (years)               |                                       |                                      | <0.0001              |
| ≤12                             | 472 (41.7%)                           | 252 (51.9%)                          |                      |
| 13–15                           | 348 (30.7%)                           | 107 (22.0%)                          |                      |
| ≥16                             | 307 (27.1%)                           | 124 (25.5%)                          |                      |
| Missing data                    | 5 (0.4%)                              | 3 (0.6%)                             |                      |
| Smoking status                  |                                       |                                      | 0.235                |
| Never                           | 679 (60.0%)                           | 277 (57.0%)                          |                      |
| Former                          | 197 (17.4%)                           | 102 (21.0%)                          |                      |
| Current                         | 251 (22.2%)                           | 107 (22.0%)                          |                      |
| Missing data                    | 5 (0.4%)                              | 0 (0%)                               |                      |

|                                    |              |             |         |
|------------------------------------|--------------|-------------|---------|
| Sexual orientation                 |              |             | <0.0001 |
| MSW                                | 1009 (89.1%) | 376 (77.4%) |         |
| MSM                                | 21 (1.9%)    | 33 (6.8%)   |         |
| MSWM                               | 39 (3.4%)    | 53 (10.9%)  |         |
| Missing data                       | 63 (5.6%)    | 24 (4.9%)   |         |
| Lifetime number of sexual partners |              |             | 0.003   |
| 0–2                                | 254 (22.4%)  | 93 (19.1%)  |         |
| 3–7                                | 336 (29.7%)  | 112 (23.0%) |         |
| 8–19                               | 281 (24.8%)  | 130 (26.7%) |         |
| ≥20                                | 254 (22.4%)  | 143 (29.4%) |         |
| Missing data                       | 7 (0.6%)     | 8 (1.6%)    |         |
| Ever had oral sex with a man       |              |             | <0.0001 |
| No                                 | 933 (82.4%)  | 353 (72.6%) |         |
| Yes                                | 114 (10.1%)  | 107 (22.0%) |         |
| Missing data                       | 85 (7.5%)    | 26 (5.3%)   |         |

---

Data are n (%). The variables listed have been associated with oral HPV incidence, oral HPV persistence, and HPV seropositivity in prior *HIM Study* publications.

MSW=men who have sex with women. MSM=men who have sex with men. MSWM=men who have sex with women and men.

<sup>a</sup>Men seronegative for all four HPV types (6/11/16/18).

<sup>b</sup>Men seropositive for at least one HPV type (6/11/16/18).

<sup>c</sup>Exact Pearson Chi-square P-value using Monte Carlo estimation.
